# Supplementary material for: Synthesis, photophysics, ion detection and DFT investigation of novel cyano-substituted red-light chromophores with a triphenylamine donor
Source: Royal Society of Chemistry journal article supplement (doi:10.1039/c5ra24341f), 2016-01-01

# **Synthesis, Photophysics, Ion Detection and DFT Investigation of Novel Cyano-substituted Red-light Chromophores with Triphenylamine Donor**

Na Sun, Peng Zhang\*, Yan-ling Hou

School of Chemistry and Chemical Engineering, Southwest University, Chongqing  
400715, PR China

## **Supporting Information**

**Table S1.** The electrochemical parameter of compounds **3-5**

**Fig.S1.** TGA curves of compounds **3-5** at a heating rate of 10°C min<sup>-1</sup> under nitrogen

**Fig.S2.** DSC curves of compounds **3-5** at a heating rate of 10°C min<sup>-1</sup> under nitrogen

**Fig.S3.** X-ray powder diffraction patterns and d-space data for compounds **3-5**

**Fig.S4.** The emission spectra in powder for compounds **3-5**

**Fig.S5.** The images of the emissions in the powder for compounds **3-5**

**Fig.S6.** The dependence of the emission spectra of compounds **3** and **4** on their concentration in dichloromethane solution (mol/L)

**Fig.S7.** The dependence of absorption spectra of the compounds **3-5** on the solvent polarity

**Fig.S8.** The photographs of compounds **3-5** in different polar solvents (10<sup>-5</sup>M) (left to right, toluene, dichloromethane, THF, ethyl acetate and DMF).

**Fig.S9.** The responses of absorption and fluorescence spectra of the compound **3** (1×10<sup>-5</sup> M/L) in DMF with the addition of ion metal-DMF (1×10<sup>-4</sup> M/L)

**Fig.S10.** The responses of absorption and fluorescence spectra of the compound **4** (1×10<sup>-5</sup> M) in DMF with the addition of ion metal-DMF (1×10<sup>-4</sup> M/L)

**Fig.S11.** The ion responses of absorption and fluorescence spectra of the compound **5** (1×10<sup>-5</sup> M/L) in DMF with the addition of ion metal-DMF (1×10<sup>-4</sup> M/L)

**Fig.S12.** Fluorescence spectra of the compounds **3-5** (1×10<sup>-5</sup> M/L) in DMF upon

---

\* Corresponding author. Tel: +86 023-68252360.

E-mail address: ybzhang@swu.edu.cn

addition of  $\text{Hg}^{2+}$ -DMF solution ranging from  $1 \times 10^{-4}$  to  $9 \times 10^{-4}$  M/L

**Table S1**

| <b>Compd</b> | <b>E<sub>ox, peak</sub> (ev)</b> | <b>E<sub>red, peak</sub> (ev)</b> |       |       |
|--------------|----------------------------------|-----------------------------------|-------|-------|
| <b>3</b>     | 1.39                             | -1.70                             | —     | —     |
| <b>4</b>     | 1.49                             | -1.85                             | -2.70 | —     |
| <b>5</b>     | 1.48                             | -1.94                             | -2.27 | -2.57 |

**Fig.S1**

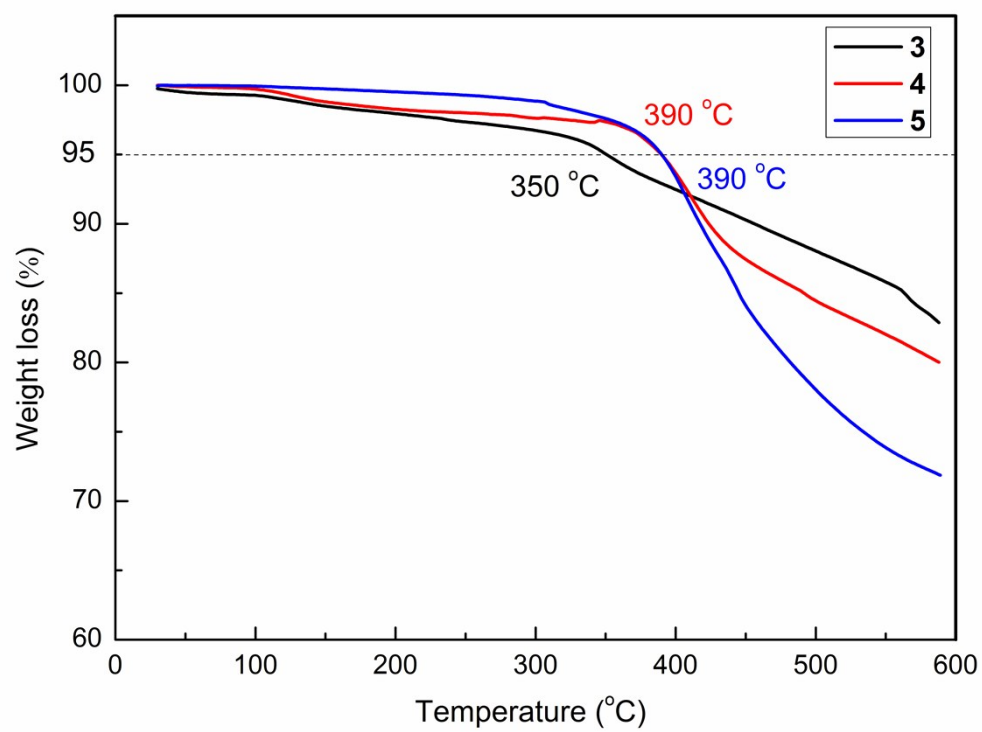

Fig.S2

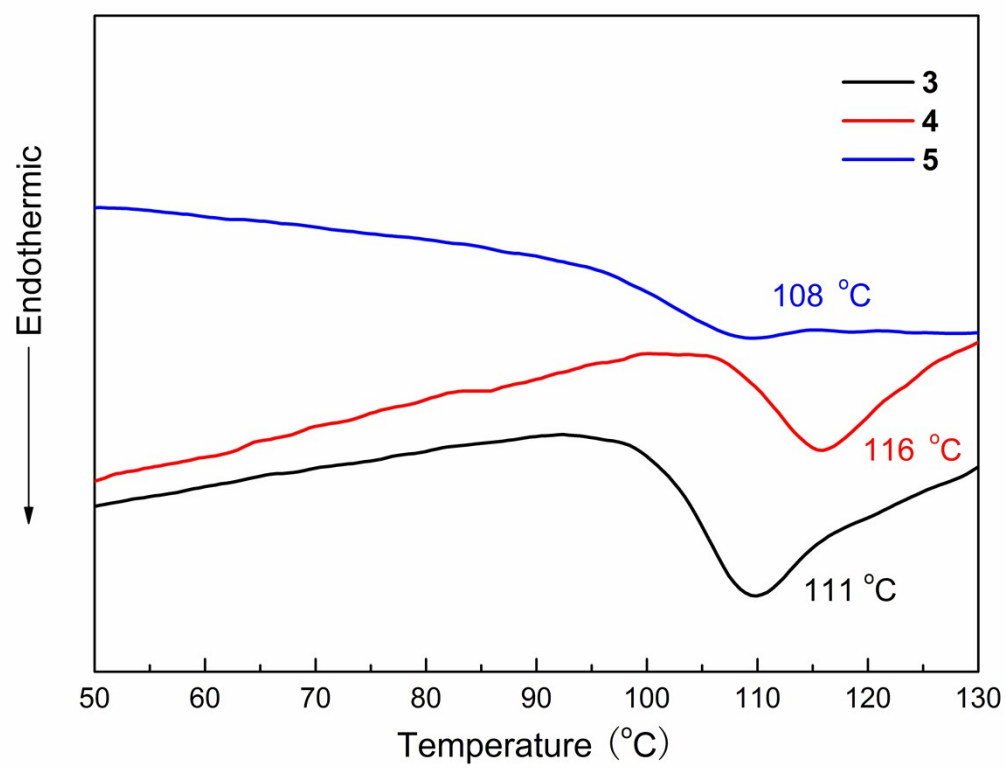

**Fig.S3**

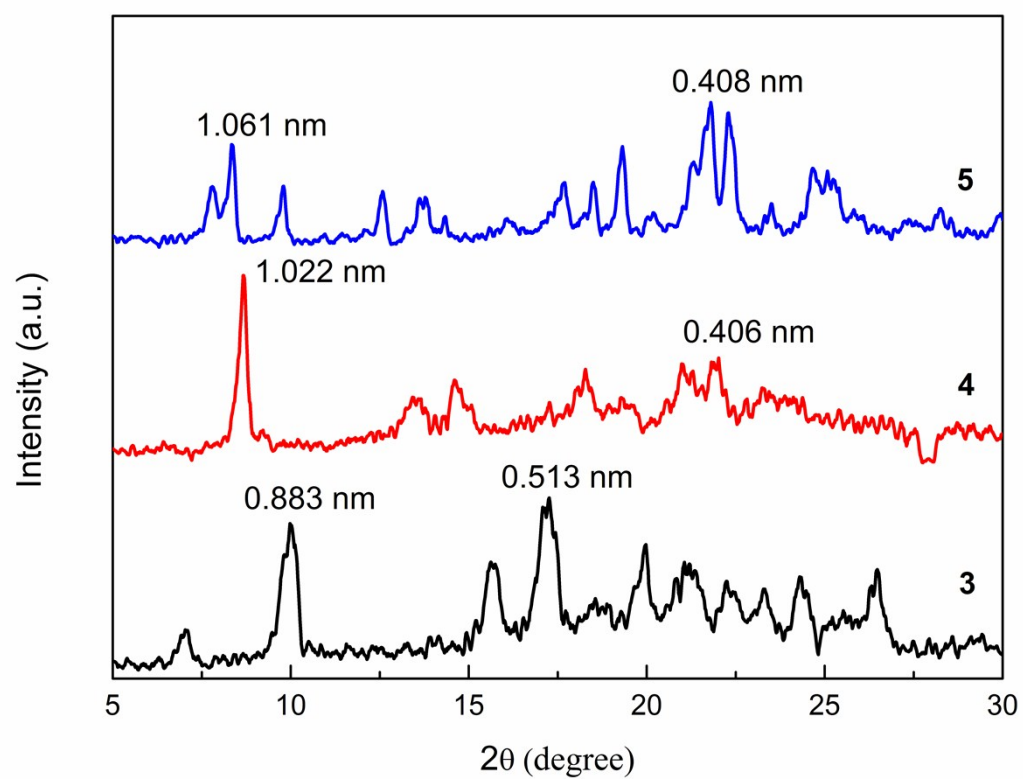

**Fig.S4**

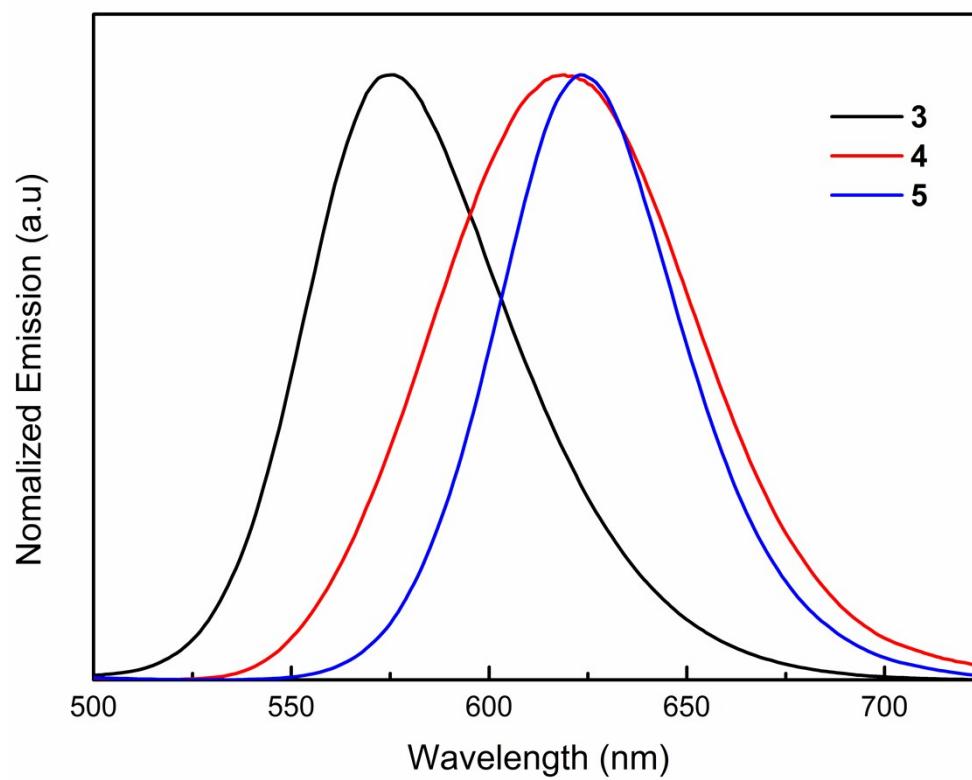

**Fig.S5**

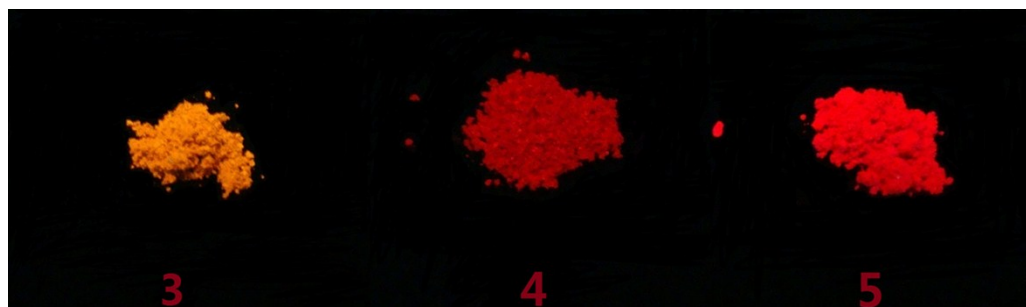

**Fig.S6**

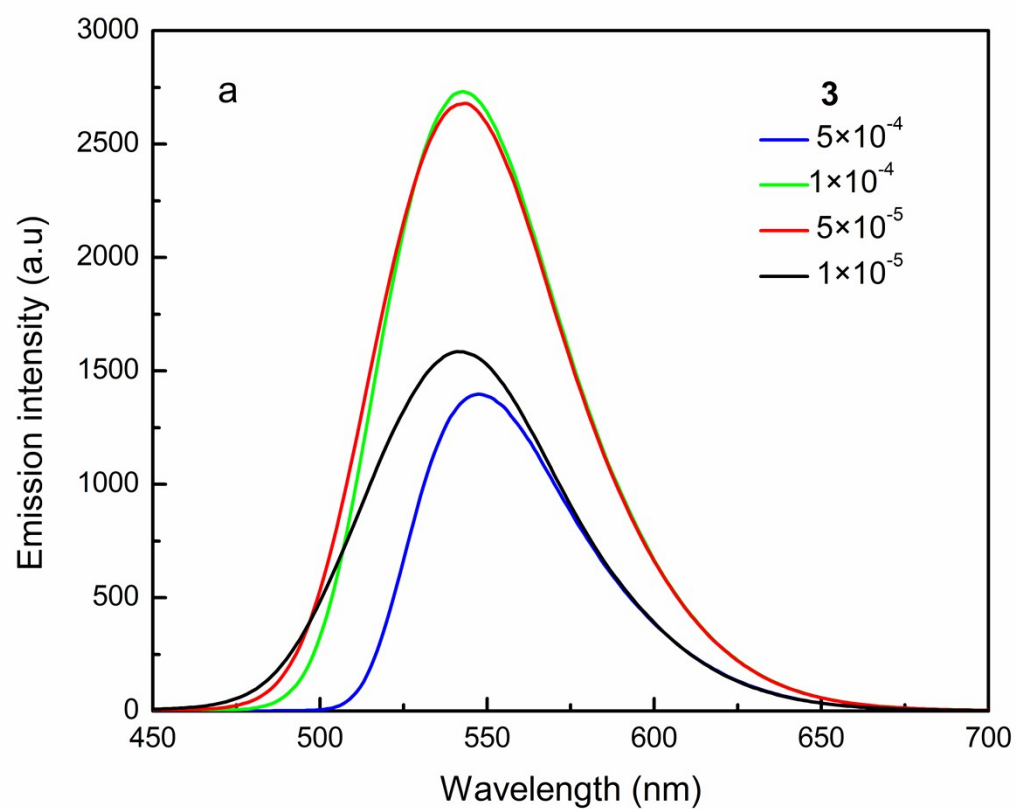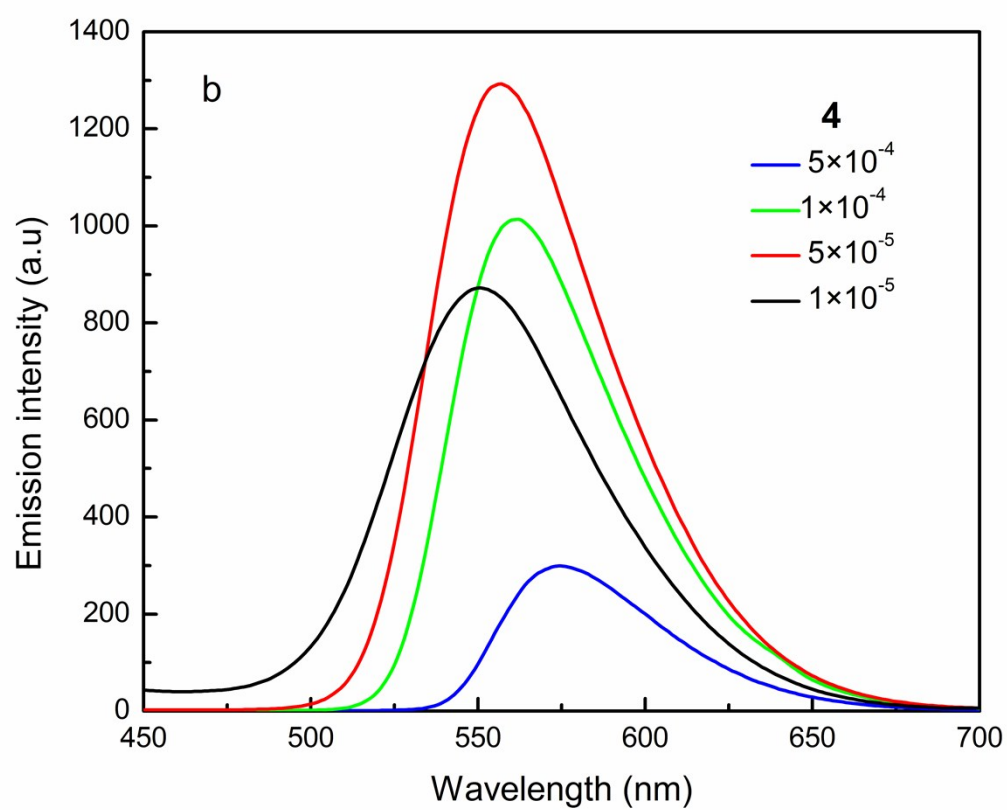

**Fig.S7**

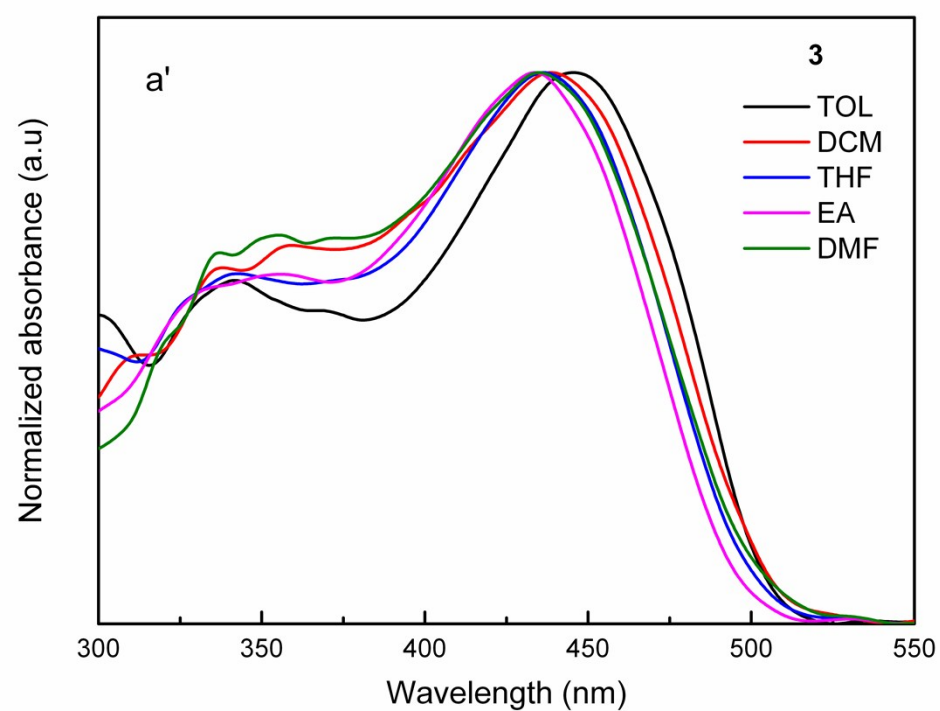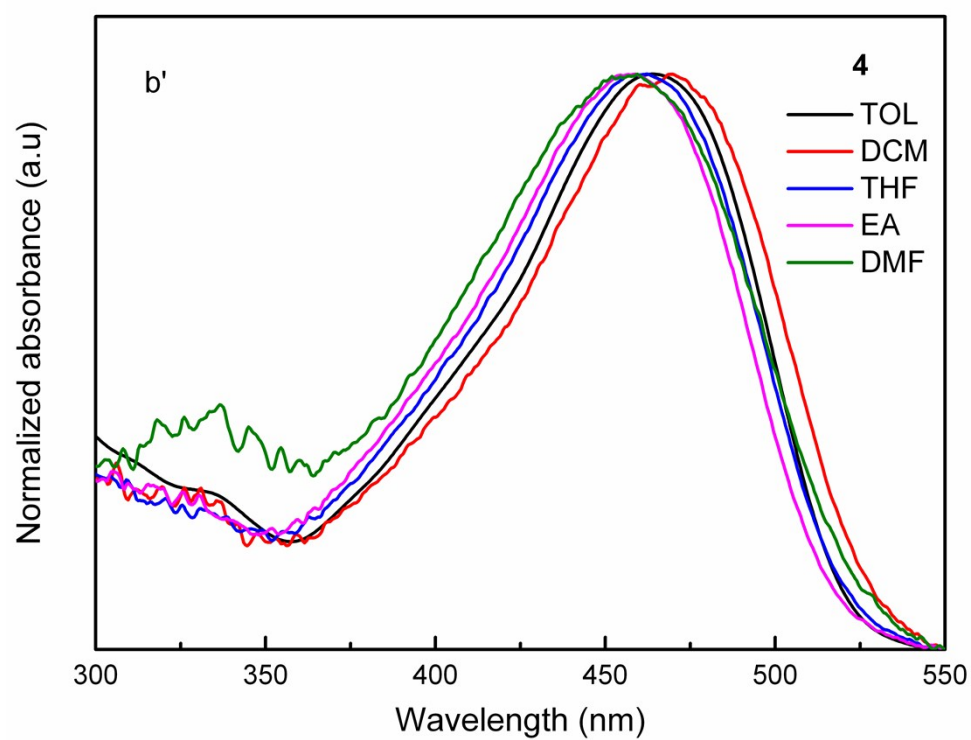

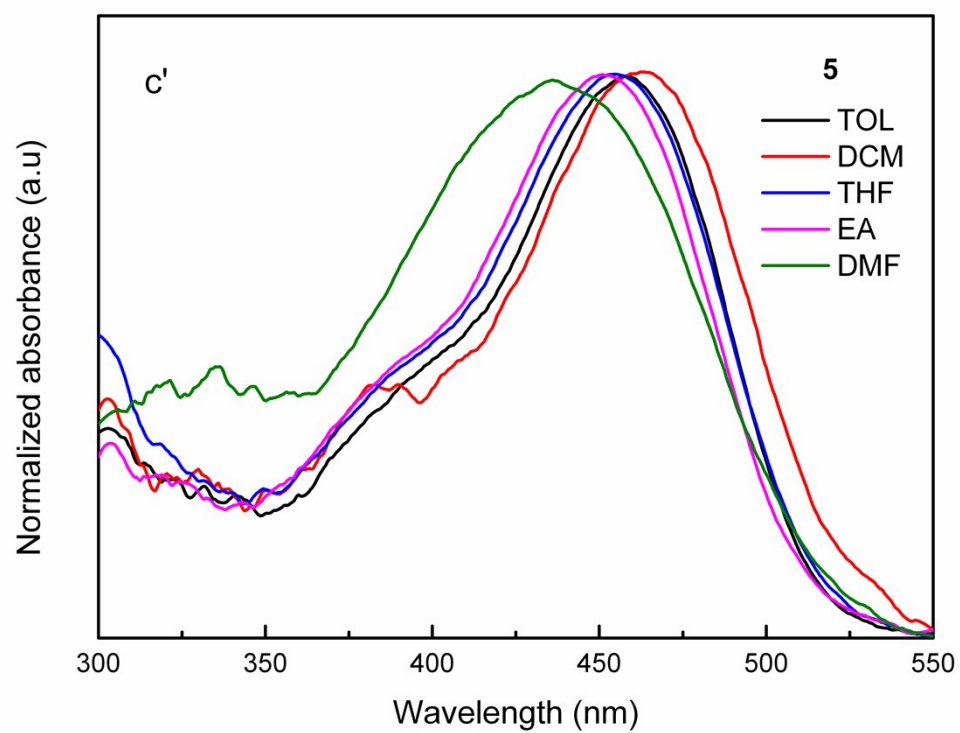

**Fig.S8**

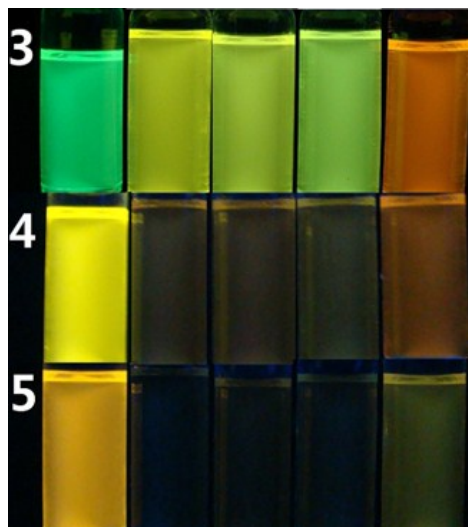

**Fig.S9**

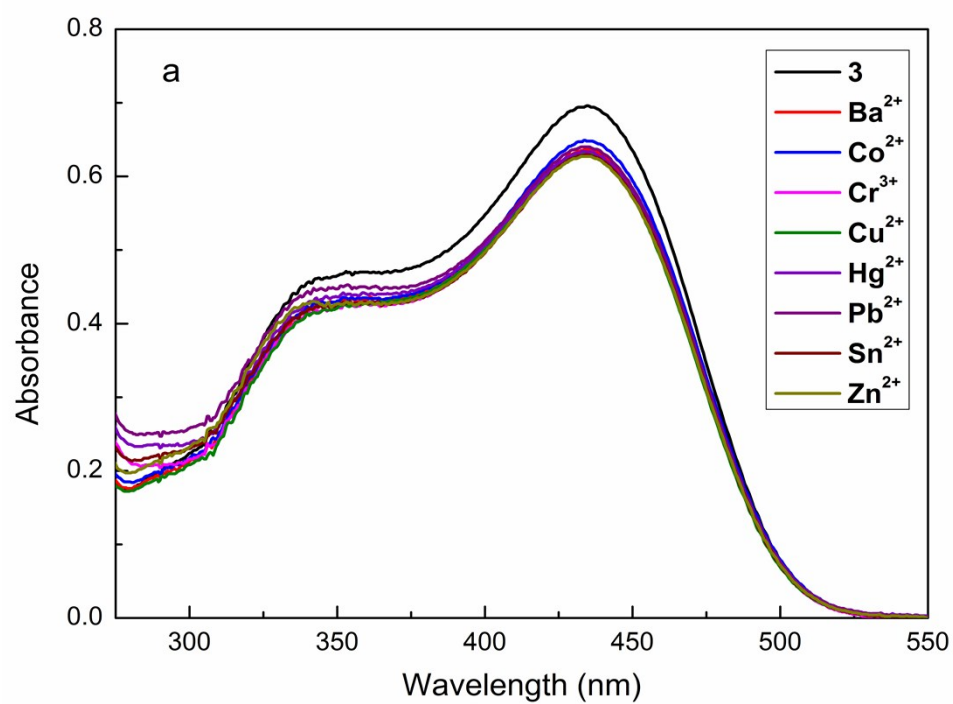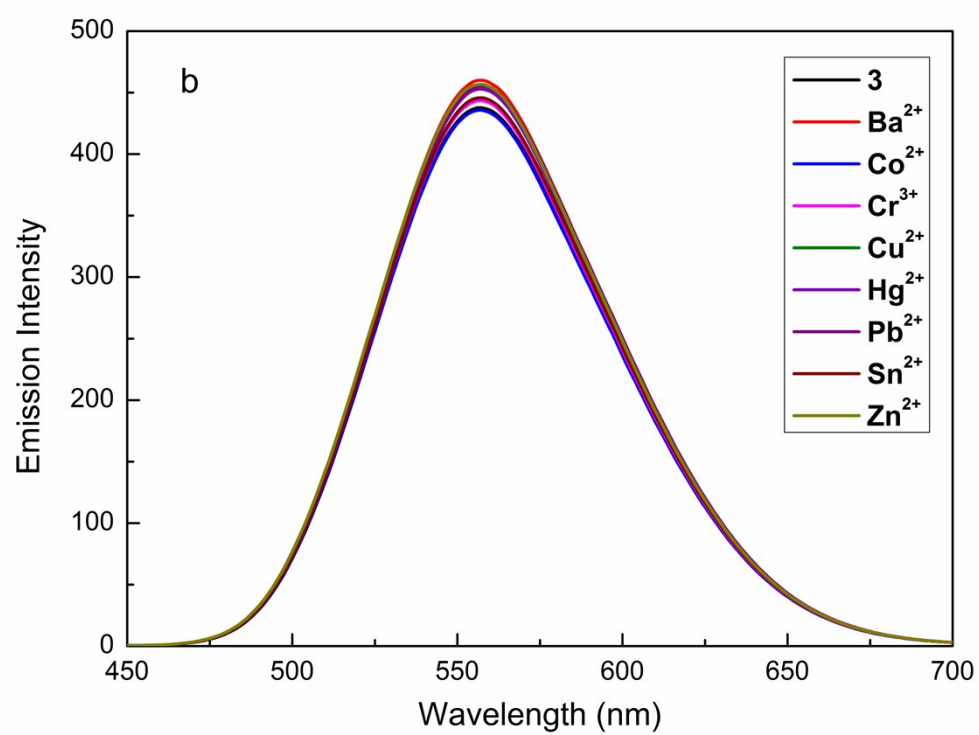

**Fig.S10**

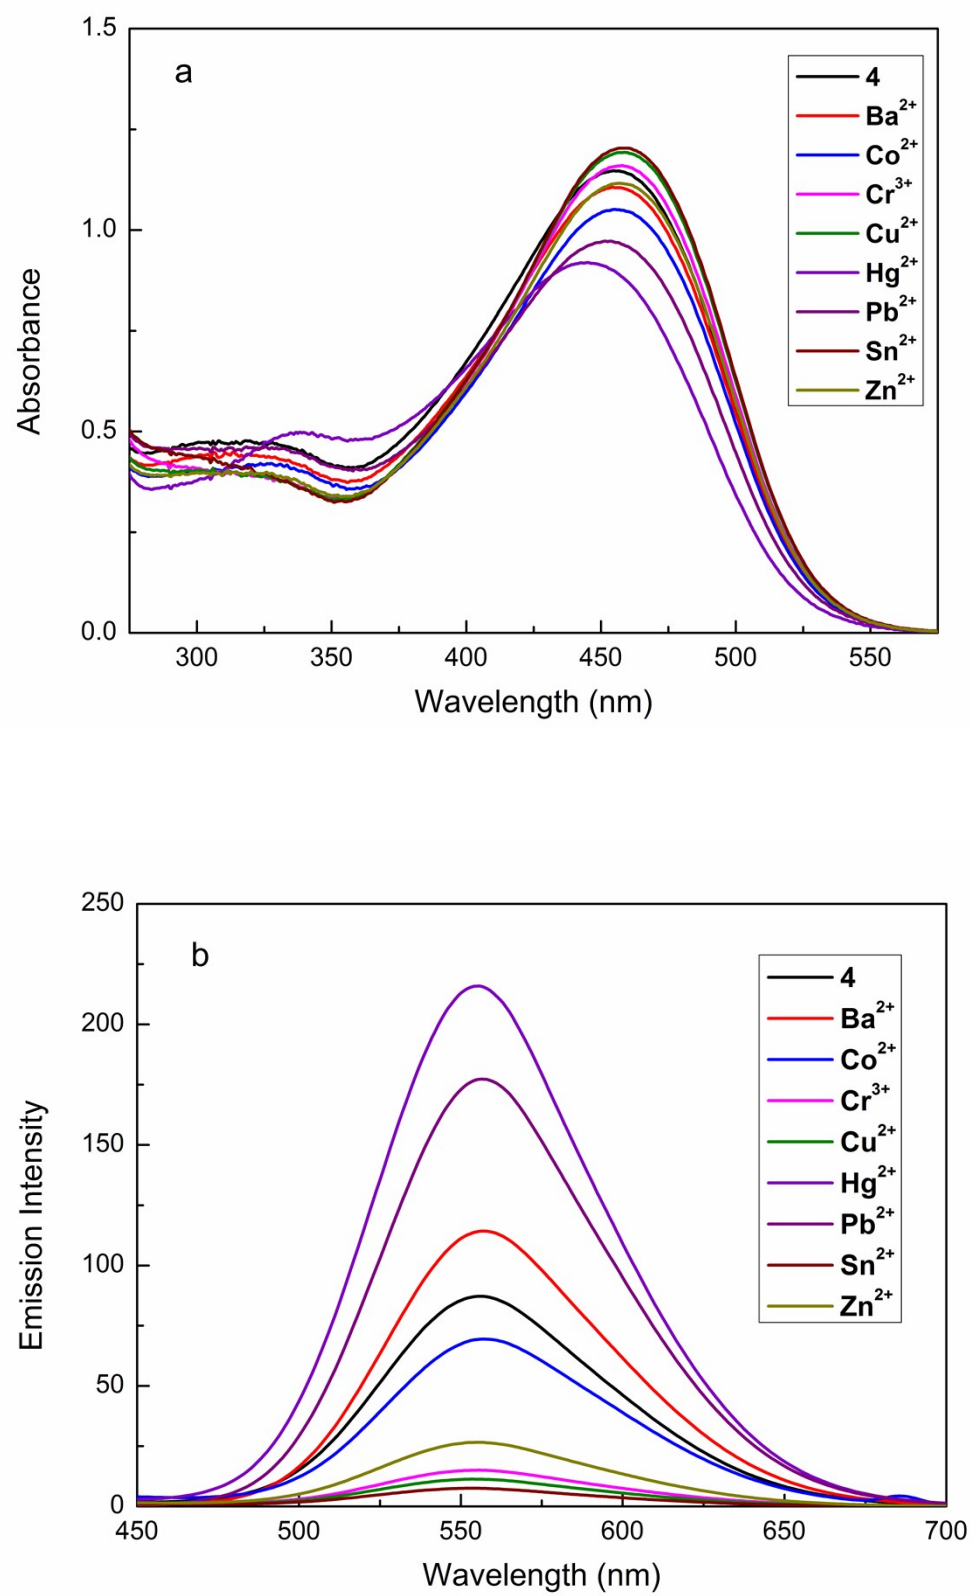

**Fig.S11**

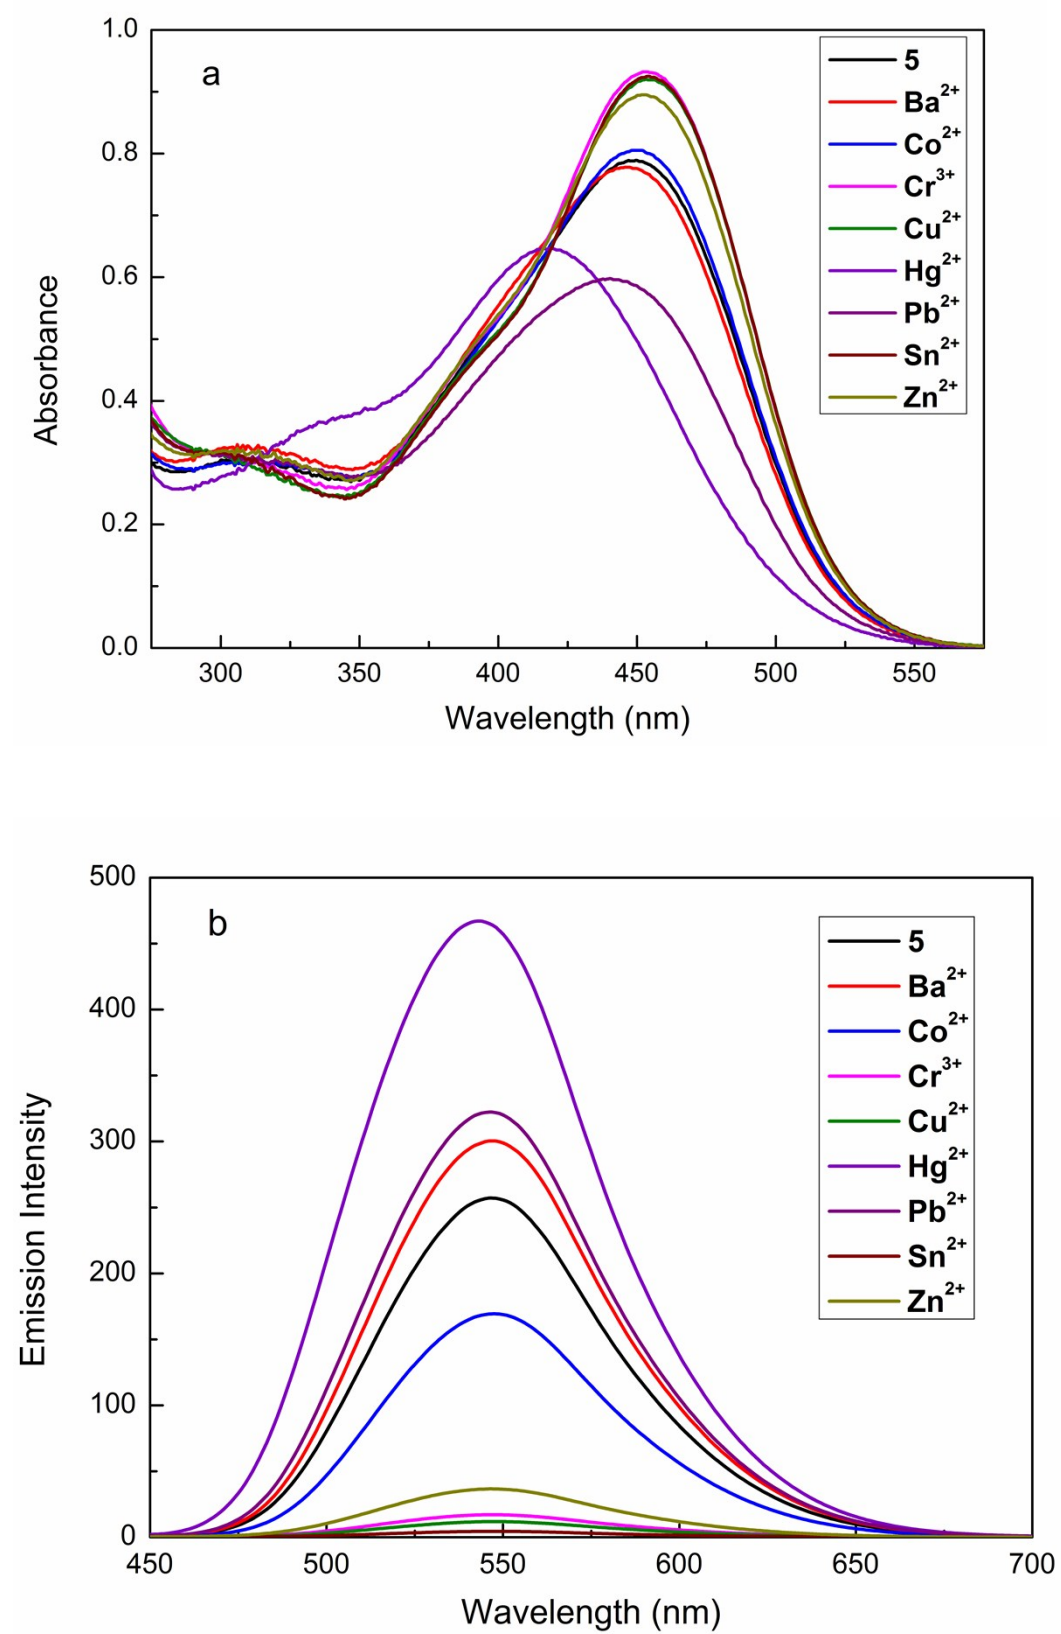

**Fig.S12**

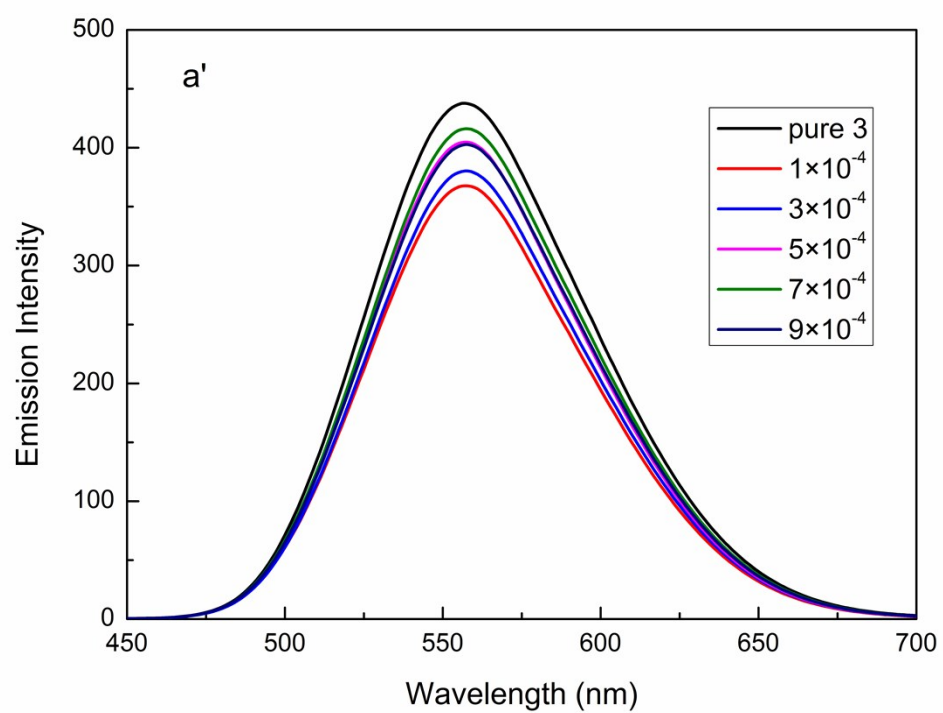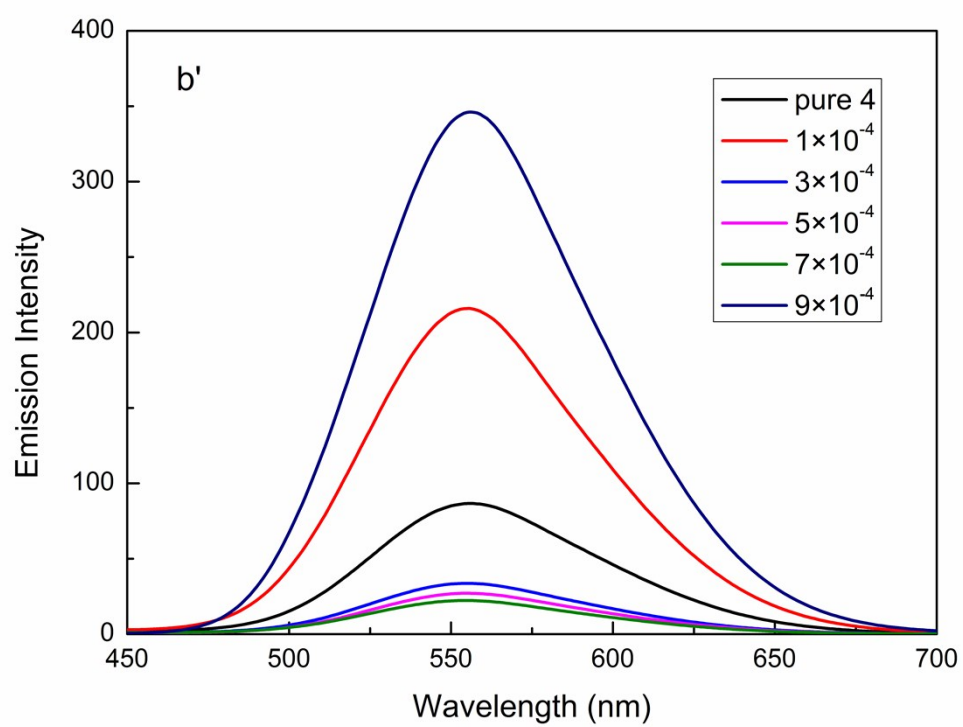

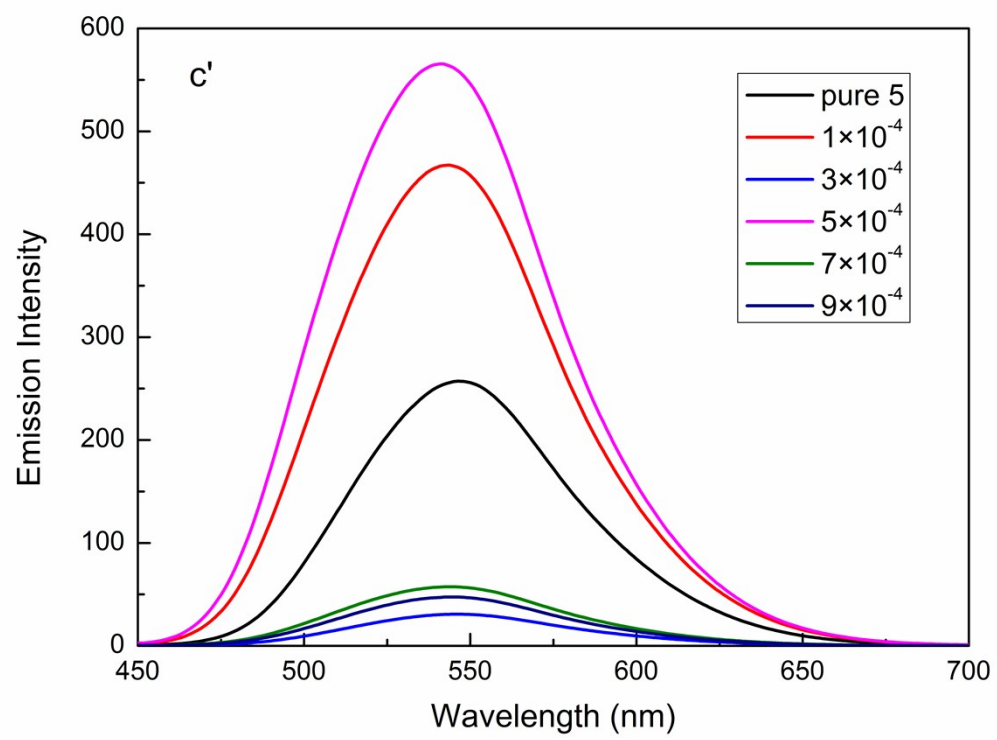

Supplement: c5ra24341f1.pdf [file c5ra24341f1.pdf]
